# Supplementary figures and images for: Value of 3D Preoperative Planning for Primary Total Hip Arthroplasty Based on Artificial Intelligence Technology
Source: Research Square preprint supplement (doi:10.21203/rs.3.rs-120578/v2), 2021-01-26

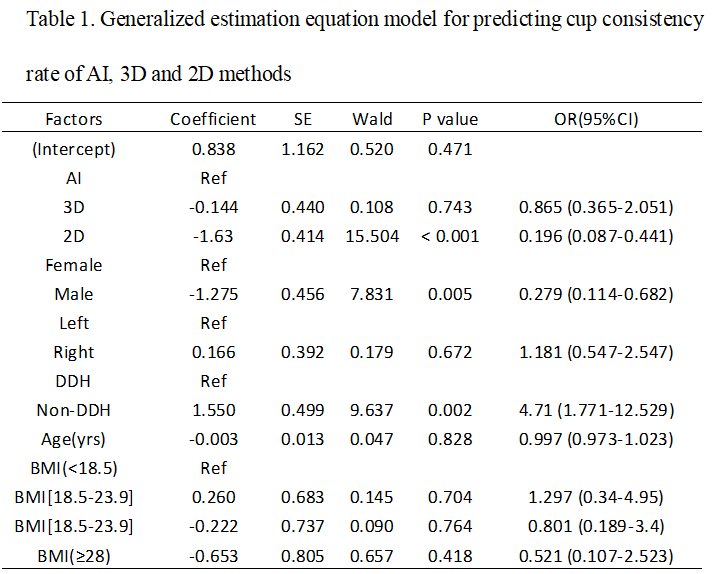


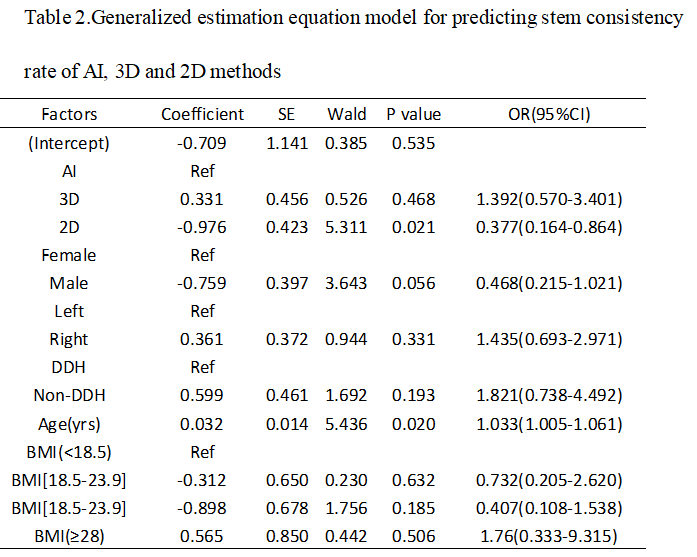


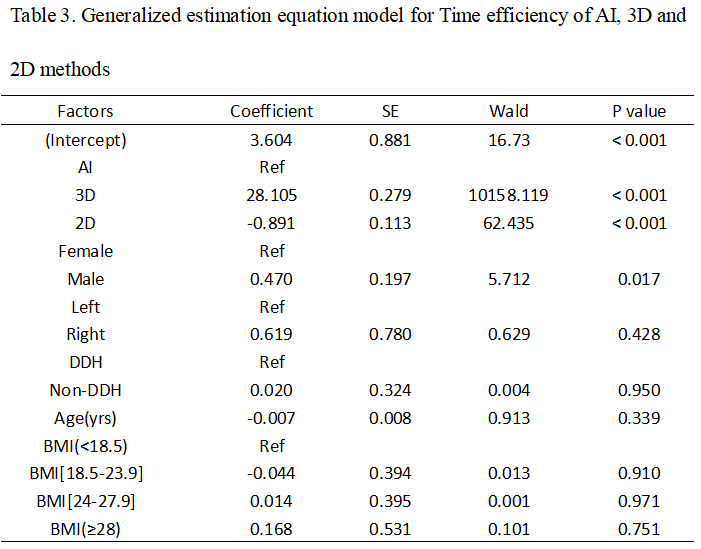


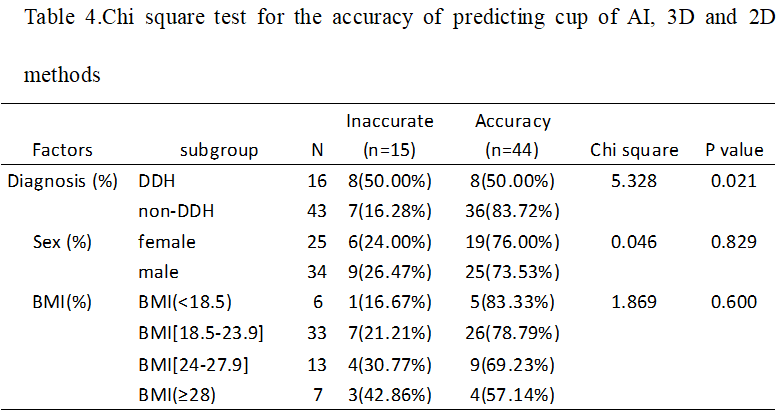


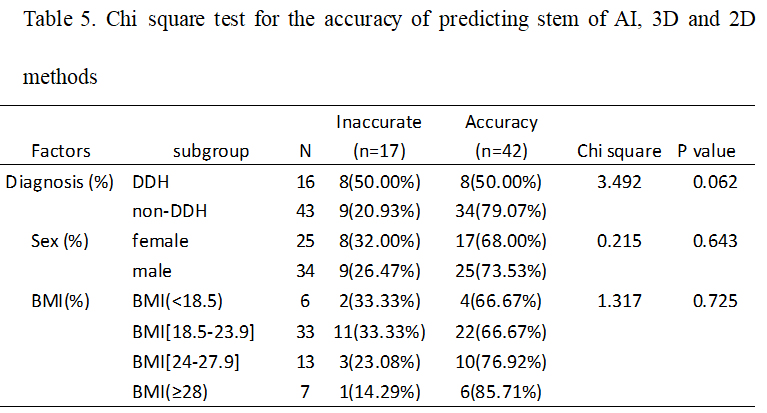

Supplement: Supplementary file 1 [file 7a34cadfc674edfabafc1c9c.docx]
